# Supplementary material for: Cytoskeleton reorganization induced by a novel K6-K14 keratin fusion promotes cancer stemness and cellular plasticity via cGAS-STING selection
Source: Research Square preprint supplement (doi:10.21203/rs.3.rs-6985645/v1), 2025-07-24
Supplement: Supplementary file 1 [file 4f679130f619014078e788af.docx]

**Figure S1. Acute expression of keratin fusion (KF) variant K6-K14/V5 in Cal27 and FaDu cells by transient gene transfection. A** Specific QPCR for K6-K14/V5 was previously designed and utilized to detect the expression of such KF variant in OSCC cells (11). Cal27 and FaDu cells were used as the cell line models in this study due to their low expression levels of K6-K14/V5 (orange and cyan lines, respectively). Forty-eight hours after transient transfection of the K6-K14/V5 expression vector, elevated levels of K6-K14/V5 can be detected in the treated cells by KF-specific QPCR (red and purple lines, respectively). The vector (0.1 ng/ml) was utilized as the positive control for the KF-specific QPCR (yellow). The QPCR reactions were performed in triplicates and the results were shown in the amplification plot. **B** To know the impact of K6-K14/V5 expression on wild type keratin filament network, K6-K14/V5 vector (tagged with GFP) was co-transfected with K14 vector (tagged with mCherry) into FaDu cells. The filament distributions of these two constructs were visualized directly under a fluorescent microscope 48 h after the transfection. K14 vector tagged with GFP was utilized as the backbone control for K6-K14/V5.

**Figure S2. Cell topography analysis of K6-K14/V5-transfected cells. A** The integrity of LINC complex in the transfected cells was assessed by co-transfection with SUN2 expression vector tagged with mCherry. **B** The DNA intensity of transfected cells was evaluated by scanning the DAPI signals across the entire nucleus under a confocal microscope (*left*). Flow cytometry was utilized to analyze the DNA content of transfected cells by detecting PI signal (*right*). **C** Nucelar deformation induced by acute expression of K6-K14/V5 was detected by staining the nucleus with DAPI. Cross section clearly revealed nuclear distortion and DNA fragmentation in the transfected cell (*left*). Distortion of LINC complex structure by K6-K14/V5-GFP aggregates (green) was found by co-transfecting cells with SUN2-mCherry (red) (*right*). **D** The nuclear volume of transfected cells was estimated based on the DAPI images captured by a confocal microscope. **E** The nuclear stiffness of transfected cells was detected by an atomic force microscope (AFM). **F** Centrosomes were visualized and quantified by co-transfection with TUBG expression vector tagged with mCherry. Data from each construct were compared to the ones from K14 control by *t*-test. The *p*-values were presented as *: *p* < 0.05; **: *p* < 0.01; and ***: *p* < 0.001.

**Figure S3. Gene networks upregulated by acute K6-K14/V5 expression in Cal27 cells. A** RNA samples were prepared from Cal27 cells transiently transfected with K14-GFP or K6-K14/V5-GFP expression vector for 48 h. The transcriptome analysis was done by using Clariom_D_Human microarray, and genes upregulated in K6-K14/V5-expressing cells with fold change more than 2 were analyzed for their interaction networks based on Reactome databank. Reactomes 1 to 3 indicate the enriched pathways associated with DDR-induced IFN responses, whereas Reactomes 4 to 7 are the ones involved in cholesterol/steroid metabolism.The interactomes in **B** and **C** indicate the major two gene clusters up-regulated by transient expression of K6-K14/V5 in cal27 cells, DDR-induced interferon responses in b and cholesterol/steroid metabolism in **C**.

**Figure S4. Transcriptome analyses in K6-K14/V5 surviving (3D-V5) cells.** Stable GFP- or K14-expressing Cal27 cell clones were established by limiting dilution under G418 selection (800 µg/ml). 3D-V5 cells were enriched by culturing K6-K14/V5-transfected Cal27 cells on dishes covered with collagen gels for one month in G418 containing medium. Two independent cell clones for each construct were picked up for RNA-seq study. Key pathways upregulated (NES > 1.5; adjusted *p*-value < 0.05; *left*) or downregulated (NES < -1.5; adjusted *p*-value < 0.05; *right*) in 3D-V5 cells were analyzed by gene set enrichment assay (GSEA) using the information from Biocarta (B), KEGG (K), and Reactome (R) databanks. Pathways in colors are the ones involved in cancer dormancy and cellular adaptation, including suppression of cell cycle progression (cell cycle, cyclin A/B1/B2 associated events during G2/M transition, POLO-like kinase-mediated events), downregulation of focal adhesion-mediated signaling (focal adhesion, signaling by Hippo), suppression of ERK/MAPK signaling (MAPK signaling pathway), and reduction of immunogenic potentials (IL10 signaling, inflam pathway, JAK/STAT signaling pathway). In line with these characteristics, enhancement of drug resistance (ABC transporters, drug metabolism cytochrome P450, metabolism of xenobiotics by cytochrome P450, phase I functionalization of compounds) and upregulation of retinoic acid signaling were also observed.

**Figure S5. Intercellular interactions between 3D-V5 cells and HOrFs.** HOrFs were cultured in the conditioned media from 3D-V5 cells for 48 h and subjected to transcriptome analysis by RNA-seq. HOrFs cultured in conditioned media from Cal27 cells stably express GFP or K14 were utilized as the controls. Sanky diagrams show the **A,** incoming and **B,** outgoing communications in 3D-V5 cells, respectively. The width of the edges represents the weight value of each ligand based on its normalized gene count. The heatmaps indicate fold changes (F.C.) in the gene expression of the indicated ligands or receptors in 3D-V5 cells or 3D-V5-educated HOrFs compared to their respective controls.
