# Supplementary material for: Cytoskeleton reorganization induced by a novel K6-K14 keratin fusion promotes cancer stemness and cellular plasticity via cGAS-STING selection
Source: Research Square preprint supplement (doi:10.21203/rs.3.rs-6985645/v1), 2025-07-24
Supplement: Supplementary file 2 [file fba4260c2375863dced85f43.docx]

**Table S1.** List of antibodies utilized in this study

| **Primary Antibodies** | | | | | |
| --- | --- | --- | --- | --- | --- |
| **antigen** | **host** | **usagea** | **dilution factor** | **manufacturer** | **catalog No.** |
| p-CHK2 | mouse | Western blot  IF staining | 1/2000  1/200 | R&D | MAB1626 |
| γH2AX | rabbit | Western blot  IF staining | 1/1000  1/200 | Abcam | ab11174 |
| p53 | rabbit | Western blot | 1/2000 | GeneTex | GTX100629 |
| p21 | mouse | Western blot | 1/1000 | Santa Cruz | sc-377515 |
| cGAS | rabbit | IF staining | 1/200 | Sigma-Aldrich | ABF124 |
| STING | rabbit | IF staining | 1/100 | Proteintech | 19851-1-AP |
| vinculin | rabbit | IF staining | 1/200 | GeneTex | GTX113294 |
| SUN2 | rabbit | IF staining | 1/200 | Servicebio | GB112747 |
| ITGB1 | mouse | Western blot | 1/1000 | Millipore | MAB2259Z |
| p-ITGB1 | rabbit | Western blot | 1/1000 | GeneTex | GTX25189 |
| FAK | rabbit | Western blot | 1/1000 | GeneTex | GTX100764 |
| p-FAK | rabbit | Western blot | 1/1000 | Abcam | ab4803 |
| MAPK | mouse | Western blot | 1/1000 | Invitrogen | 13-6200 |
| p-MAPK | rabbit | Western blot | 1/1000 | Cell Signaling | 4370S |
| PI3K | mouse | Western blot | 1/1000 | Santa Cruz | sc-1637 |
| p-PI3K | rabbit | Western blot | 1/1000 | GeneTex | GTX132597 |
| PAK1 | rabbit | Western blot | 1/1000 | GeneTex | GTX103797 |
| myosin IIb | mouse | Western blot | 1/1000 | Santa Cruz | sc-376989 |
| BECN1 | rabbit | Western blot | 1/1000 | ABclonal | A7353 |
| ATG9A | rabbit | Western blot | 1/1000 | ABclonal | A5571 |
| LC3 | rabbit | Western blot | 1/1000 | ABclonal | A5618 |
| LAMP1 | rabbit | Western blot | 1/1000 | ABclonal | A2582 |
| LAMP2 | rabbit | Western blot | 1/1000 | ABclonal | A1961 |
| GAPDH | rabbit | Western blot | 1/5000 | GeneTax | GTX100118 |
| CDC42 | rabbit | IF staining | 1/200 | GeneTax | GTX100904 |
| CD44 | mouse | IHC staining | 1:200 | NOVUS | NBP1-47386 |
| Ki67 | rabbit | IHC staining | 1:500 | GeneTex | GTX16667 |
| p-FGFR1 | rabbit | IHC staining | 1:200 | Affinity | AF3157 |
| p-FGFR3 | rabbit | IHC staining | 1:200 | Affinity | AF8439 |
| **Secondary Antibodies** | | | | | |
| **antigen** | **formata** | **usagea** | **dilution factor** | **manufacturer** | **catalog No.** |
| goat anti-mouse IgG | Rhodamine | IF staining | 1/200 | Sigma-Aldrich | 12-509 |
| goat anti-rabbit IgG | Rodamine | IF staining | 1/200 | Abgent | ASR1424 |
| goat anti-mouse IgG | HRP | Western blot | 1/2000 | Jackson | 115-035-003 |
| donkey anti-rabbit IgG | HRP | Western blot | 1/1000 | BioLegend | 406401 |
| IHC detection kit | Polymer-HRP | IHC staining | 3/100 | BioWorld | BD6001 |

aAbbreviations: IF, immunofluorescence; IHC, immunohistochemistry; HRP, horseradish peroxidase.

**Table S2.** Expression analysis of genes involved in autophagic process in cells stably express different constructs by RNA-seq studya

| **Gene symbol** | **Description** | **GFP** | | **K14** | | **3D-V5** | | **3D-V5 vs. GFP (F.C.)** | **3D-V5 vs. K14 (F.C.)** |
| --- | --- | --- | --- | --- | --- | --- | --- | --- | --- |
| Clone 1 | Clone 2 | Clone 1 | Clone 2 | Clone 1 | Clone 2 |
| **Initiation** | | | | | | | | | |
| ULK1 | Unc-51 Like Autophagy Activating Kinase 1 | 747.6 | 532.4 | 911.9 | 1485.4 | 1297.9 | 1257.2 | 2.0 | 1.1 |
| RB1CC1 (A.K.A. FIP200) | RB1 Inducible Coiled-Coil 1 | 2902.7 | 2758.0 | 2372.1 | 2800.4 | 2317.7 | 2389.4 | 0.8 | 0.9 |
| ATG13 | Autophagy Related 13 | 1427.0 | 1339.6 | 1209.0 | 1236.1 | 1430.9 | 1536.5 | 1.1 | 1.2 |
| PRKAA2 (AMPK) | protein kinase AMP-activated catalytic subunit alpha 2 | 510.7 | 377.0 | 552.7 | 385.4 | 782.4 | 858.9 | 1.9 | 1.8 |
| ATG14 | Autophagy Related 14 | 366.5 | 313.1 | 411.4 | 432.7 | 451.0 | 498.5 | 1.4 | 1.1 |
| BECN1 | Beclin 1 | 809.0 | 887.0 | 752.6 | 761.9 | 1150.8 | 1206.2 | 1.4 | 1.6 |
| PIK3C3 | Phosphatidylinositol 3-Kinase Catalytic Subunit | 466.9 | 478.1 | 426.7 | 413.0 | 553.5 | 534.5 | 1.2 | 1.3 |
| BCL2 | BCL2 Apoptosis Regulator | 89.7 | 56.4 | 42.3 | 54.2 | 60.8 | 54.1 | 0.8 | 1.2 |
| **Vesicle elongation** | | | | | | | | | |
| ATG5 | Autophagy Related 5 | 1059.5 | 1146.9 | 971.3 | 979.8 | 864.0 | 825.8 | 0.8 | 0.9 |
| ATG16L1 (ATG16) | Autophagy Related 16 Like 1 | 402.6 | 430.2 | 449.2 | 446.5 | 607.7 | 622.6 | 1.5 | 1.4 |
| ATG12 | Autophagy Related 12 | 1199.9 | 1226.7 | 1182.0 | 1079.3 | 1196.3 | 1289.3 | 1.0 | 1.1 |
| WIPI1 | WD Repeat Domain, Phosphoinositide Interacting 1 | 468.8 | 319.5 | 351.1 | 566.8 | 126.3 | 135.1 | 0.3 | 0.3 |
| ATG9A (ATG9) | Autophagy Related 9A | 583.9 | 612.3 | 583.5 | 502.3 | 923.8 | 908.9 | 1.5 | 1.7 |
| MAP1LC3A (LC3) | Microtubule Associated Protein 1 Light Chain 3 Alpha | 0.1 | 0.1 | 0.1 | 0.1 | 2.0 | 1.0 | 15.0 | 15.0 |
| **Phagophore** | | | | | | | | | |
| ATG4A (ATG4) | Autophagy Related 4A Cysteine Peptidase | 306.1 | 333.3 | 215.2 | 209.0 | 441.5 | 411.4 | 1.3 | 2.0 |
| ATG3 | Autophagy Related 3 | 1416.3 | 1658.0 | 1369.2 | 1168.0 | 1323.6 | 1368.4 | 0.9 | 1.1 |
| ATG7 | Autophagy Related 7 | 904.5 | 829.5 | 884.9 | 791.5 | 592.5 | 555.6 | 0.7 | 0.7 |
| **Autophagosome** | | | | | | | | | |
| SQSTM1 (p62) | Sequestosome 1 | 7732.5 | 7106.0 | 8661.9 | 7121.6 | 5821.2 | 5840.8 | 0.8 | 0.7 |
| OPTN | Optineurin | 1651.2 | 1504.7 | 1753.6 | 1883.7 | 2084.1 | 1946.9 | 1.3 | 1.1 |
| CALCOCO2 (NDP52) | Calcium Binding And Coiled-Coil Domain 2 | 2018.7 | 1537.7 | 2298.3 | 2276.0 | 1712.9 | 1592.6 | 0.9 | 0.7 |
| TAX1BP1 | Tax1 Binding Protein 1 | 4270.3 | 5288.2 | 3874.6 | 5990.1 | 7186.6 | 7137.1 | 1.5 | 1.5 |
| NBR1 | NBR1 Autophagy Cargo Receptor | 3916.4 | 3612.1 | 4552.4 | 4777.7 | 3605.2 | 3508.5 | 0.9 | 0.8 |
| WDFY3 | WD Repeat And FYVE Domain Containing 3 | 694.0 | 618.7 | 511.3 | 480.0 | 524.1 | 595.6 | 0.9 | 1.1 |
| CTSL | Cathepsin L | 952.3 | 1118.1 | 1119.0 | 912.8 | 1387.2 | 1376.4 | 1.3 | 1.4 |
| CTSD | Cathepsin D | 2873.5 | 3881.5 | 2398.2 | 2420.9 | 6984.3 | 6518.5 | 2.0 | 2.8 |
| **Maturation** | | | | | | | |  |  |
| LAMP1 | Lysosomal Associated Membrane Protein 1 | 6036.5 | 5632.2 | 6506.8 | 5807.7 | 8337.3 | 8175.1 | 1.4 | 1.3 |
| LAMP2 | Lysosomal Associated Membrane Protein 2 | 5120.2 | 5347.8 | 4479.5 | 4508.6 | 6746.0 | 6649.6 | 1.3 | 1.5 |
| STX17 | Syntaxin 17 | 1997.2 | 1843.3 | 1875.2 | 1824.5 | 1230.5 | 1288.3 | 0.7 | 0.7 |
| **HOPS complex** | | | | | | | | | |
| VPS11 | VPS11 Core Subunit Of CORVET And HOPS Complexes | 401.6 | 200.2 | 475.3 | 233.6 | 316.2 | 320.3 | 1.1 | 0.9 |
| VPS16 | VPS16 Core Subunit Of CORVET And HOPS Complexes | 491.3 | 292.8 | 583.3 | 347.9 | 424.4 | 421.4 | 1.1 | 0.9 |
| VPS18 | VPS18 Core Subunit Of CORVET And HOPS Complexes | 598.5 | 547.3 | 505.0 | 415.0 | 1047.3 | 1058.0 | 1.8 | 2.3 |
| VPS33A (VPS33) | VPS33A Core Subunit Of CORVET And HOPS Complexes | 199.8 | 220.4 | 176.4 | 134.1 | 252.6 | 286.3 | 1.3 | 1.7 |
| VPS39 | VPS39 Subunit Of HOPS Complex | 1202.8 | 1052.1 | 1244.1 | 1251.8 | 1235.3 | 1256.2 | 1.1 | 1.0 |
| VPS41 | VPS41 Subunit Of HOPS Complex | 2084.9 | 2516.3 | 2023.7 | 1891.5 | 2646.2 | 2616.6 | 1.2 | 1.3 |
| **Autolysosome** | | | | | | | | | |
| TFEB | Transcription Factor EB | 40.9 | 59.6 | 59.4 | 40.9 | 209.8 | 237.2 | 4.5 | 3.4 |

aThe data show the normalized counts among different cell clones, two clones for each construct. Candidate genes consistently upregulated (fold change > 1.2) or downregulated (fold change < 0.8) were colored in red and green, respectively, comparing to GFP and K14 controls.

**Table S3.** Upregulation of genes involved in actin and microtubule organization in 3D-V5 cellsa

| **Gene symbol** | **Description** | **GFP** | | **K14** | | **3D-V5** | | **3D-V5 vs. GFP (F.C.)** | **3D-V5 vs. K14 (F.C.)** |
| --- | --- | --- | --- | --- | --- | --- | --- | --- | --- |
| Clone 1 | Clone 2 | Clone 1 | Clone 2 | Clone 1 | Clone 2 |
| **Actin-binding proteins** | | | | | | | | | |
| MYH14 | Myosin Heavy Chain 14 | 13.6 | 0.1 | 38.7 | 159.7 | 824.1 | 729.7 | 112.9 | 7.8 |
| TPM3 | Tropomyosin 3 | 7446.9 | 7941.9 | 5469.8 | 6315.3 | 13386.6 | 12913.8 | 1.7 | 2.2 |
| TWF2 | Twinfilin Actin Binding Protein 2 | 300.2 | 297.1 | 296.2 | 274.0 | 508.9 | 484.5 | 1.7 | 1.7 |
| TNNT2 | Troponin T2, | 2.9 | 2.1 | 1.8 | 3.0 | 19.0 | 16.0 | 7.0 | 7.4 |
| MYLK4 | Myosin Light Chain Kinase Family Member 4 | 14.6 | 12.8 | 16.2 | 18.7 | 51.3 | 71.1 | 4.5 | 3.5 |
| MYO5A | Myosin VA | 1273.0 | 946.7 | 1038.0 | 921.6 | 1979.7 | 2172.2 | 1.9 | 2.1 |
| MYO10 | Myosin X | 3137.6 | 3182.9 | 2649.4 | 2334.1 | 4770.2 | 4982.9 | 1.5 | 2.0 |
| ARPC2 | Actin Related Protein 2/3 Complex Subunit 2 | 6627.2 | 6320.1 | 5657.9 | 7564.2 | 10245.8 | 10041.0 | 1.6 | 1.5 |
| CAPZA1 | Capping Actin Protein Of Muscle Z-Line Subunit Alpha 1 | 6416.6 | 5570.4 | 5385.1 | 4854.5 | 10397.7 | 10462.4 | 1.7 | 2.0 |
| CAPG | Capping Actin Protein, Gelsolin Like | 233.9 | 200.2 | 282.7 | 595.4 | 787.1 | 746.7 | 3.5 | 1.7 |
| FSCN1 | Fascin Actin-Bundling Protein 1 | 3941.8 | 4992.2 | 5416.6 | 5601.7 | 12139.0 | 11409.3 | 2.6 | 2.1 |
| DMTN | Dematin Actin Binding Protein | 179.3 | 123.5 | 184.5 | 157.7 | 506.1 | 469.5 | 3.2 | 2.8 |
| ABLIM1 | Actin Binding LIM Protein 1 | 2597.6 | 2927.4 | 2325.3 | 1768.3 | 4554.6 | 4945.9 | 1.7 | 2.3 |
| **Actin-mediated cell contraction** | | | | | | | | | |
| DSG3 | Desmoglein 3 | 308.0 | 322.7 | 511.3 | 755.0 | 7949.9 | 8138.1 | 25.5 | 12.7 |
| DSC2 | Desmocollin 2 | 459.1 | 705.0 | 293.5 | 692.0 | 3290.9 | 3451.4 | 5.8 | 6.9 |
| JUP | Junction Plakoglobin | 5203.1 | 5255.2 | 4743.3 | 10123.1 | 22484.5 | 21400.2 | 4.2 | 3.0 |
| TNNT2 | Troponin T2 | 2.9 | 2.1 | 1.8 | 3.0 | 19.0 | 16.0 | 7.0 | 7.4 |
| EMP2 | Epithelial Membrane Protein 2 | 1349.4 | 1247.9 | 1344.1 | 1822.0 | 2778.2 | 2743.7 | 2.1 | 1.7 |
| GSN | Gelsolin | 1336.3 | 786.9 | 1723.9 | 4060.1 | 8363.9 | 8158.1 | 7.8 | 2.9 |
| DBNL | Drebrin Like | 1745.7 | 2410.9 | 1407.0 | 1593.9 | 3701.0 | 3561.5 | 1.7 | 2.4 |
| CAMK2D | Calcium/Calmodulin Dependent Protein Kinase II Delta | 235.9 | 157.6 | 332.2 | 239.5 | 425.4 | 457.5 | 2.2 | 1.5 |
| CACNA1D | Calcium Voltage-Gated Channel Subunit Alpha1 D | 0.1 | 3.1 | 0.9 | 0.1 | 73.1 | 94.1 | 52.3 | 167.2 |
| ATP1A1 | ATPase Na+/K+ Transporting Subunit Alpha 1 | 10180.0 | 13957.4 | 9253.4 | 9322.7 | 41061.9 | 41074.7 | 3.4 | 4.4 |
| PDE4D | Phosphodiesterase 4D | 59.5 | 124.6 | 14.4 | 12.8 | 275.3 | 278.3 | 3.0 | 20.3 |
| **Microtubule organization** | | | | | | | | | |
| TUBB6 | Tubulin Beta 6 Class V | 3397.9 | 2299.1 | 2496.3 | 1628.4 | 4822.4 | 4807.8 | 1.7 | 2.3 |
| TUBA4A | Tubulin Alpha 4a | 939.6 | 1186.3 | 707.6 | 592.4 | 3152.3 | 2968.9 | 2.9 | 4.7 |
| TUBB2A | Tubulin Beta 2A Class IIa | 155.0 | 74.5 | 89.1 | 81.8 | 403.5 | 373.4 | 3.4 | 4.5 |
| TUBA1A | Tubulin Alpha 1a 1 | 7.8 | 11.7 | 33.3 | 16.8 | 62.7 | 66.1 | 6.6 | 2.6 |
| EML1 | Autophagy Related 9A | 2.9 | 6.4 | 1.8 | 5.9 | 20.9 | 33.0 | 5.8 | 7.0 |

aRNA-seq study was performed by using RNA samples from cells stably express different constructs. The data show the normalized counts of candidate genes consistently upregulated (fold change > 1.5) in 3D-V5 cells as compared to GFP and K14 controls.

**Table S4.** Overall upregulation of S100 calcium binding proteins in 3D-V5 cellsa

| **Gene symbol** | **Description** | **GFP** | | **K14** | | **3D-V5** | | **3D-V5 vs. GFP (F.C.)** | **3D-V5 vs. K14 (F.C.)** |
| --- | --- | --- | --- | --- | --- | --- | --- | --- | --- |
| Clone 1 | Clone 2 | Clone 1 | Clone 2 | Clone 1 | Clone 2 |
| S100A7A | S100 Calcium Binding Protein A7A | 26.3 | 63.9 | 2.7 | 1.0 | 2650.0 | 2734.7 | 60.2 | 1431.9 |
| S100A7 | S100 Calcium Binding Protein A7 | 443.5 | 624.0 | 31.5 | 26.6 | 26228.3 | 26815.6 | 49.7 | 910.3 |
| S100A8 | S100 Calcium Binding Protein A8 | 785.6 | 1241.7 | 75.6 | 30.6 | 17517.8 | 17646.5 | 17.3 | 330.2 |
| S100A12 | S100 Calcium Binding Protein A12 | 3.9 | 16.0 | 0.9 | 0.0 | 75.0 | 82.1 | 8.0 | 167.1 |
| S100A9 | S100 Calcium Binding Protein A9 | 7502.5 | 13730.6 | 1173.9 | 789.5 | 41160.6 | 41067.7 | 3.9 | 41.9 |
| S100A2 | S100 Calcium Binding Protein A2 | 2380.3 | 2885.8 | 1708.6 | 1628.4 | 27156.8 | 28150.9 | 10.5 | 16.6 |
| S100A3 | S100 Calcium Binding Protein A3 | 44.8 | 61.8 | 27.0 | 19.7 | 207.9 | 202.2 | 1.7 | 8.7 |
| S100A11 | S100 Calcium Binding Protein A11 | 2529.4 | 3613.1 | 2284.8 | 3216.3 | 20343.4 | 20850.7 | 3.9 | 7.5 |
| S100P | S100 Calcium Binding Protein P | 0.1 | 0.1 | 0.9 | 1.0 | 6.6 | 7.0 | 6.7 | 7.2 |
| S100A4 | S100 Calcium Binding Protein A4 | 538.0 | 330.1 | 66.6 | 66.0 | 335.2 | 341.3 | 0.8 | 5.1 |
| S100A14 | S100 Calcium Binding Protein A14 | 886.0 | 319.5 | 1047.0 | 1194.7 | 5529.7 | 5539.5 | 9.2 | 4.9 |
| S100A10 | S100 Calcium Binding Protein A10 | 1950.4 | 1997.7 | 1408.8 | 3021.1 | 8814.0 | 8795.7 | 4.5 | 4.0 |
| S100A6 | S100 Calcium Binding Protein A6 | 3771.2 | 4438.4 | 2820.4 | 2962.0 | 10018.8 | 9832.7 | 2.4 | 3.4 |
| S100A16 | S100 Calcium Binding Protein A16 | 1800.3 | 2121.2 | 1603.3 | 2678.1 | 7254.0 | 6771.7 | 3.6 | 3.3 |
| S100A1 | S100 Calcium Binding Protein A1 | 5.8 | 4.3 | 6.3 | 4.9 | 18.0 | 16.0 | 3.4 | 3.0 |
| S100A13 | S100 Calcium Binding Protein A13 | 159.9 | 142.7 | 133.2 | 157.7 | 253.5 | 251.2 | 1.7 | 1.7 |
| S100A5 | S100 Calcium Binding Protein A5 | 19.5 | 17.0 | 14.4 | 9.9 | 7.6 | 2.0 | 0.3 | 0.4 |

aRNA-seq study was performed by using RNA samples from cells stably express different constructs. The data show the normalized counts of candidate genes in 3D-V5 cells as compared to GFP and K14 controls.
